# Supplementary material
Source: ML conference proceedings conference paper supplement (https://openaccess.thecvf.com/content/ICCV2023/html/Liu_SKiT_a_Fast_ICCV_2023_paper.html)
Supplement: Supplementary file 1 [file Liu_SKiT_a_Fast_ICCV_2023_supplemental.pdf]

# Supplementary Experiment of SKiT: a Fast Key Information Video Transformer for Online Surgical Phase Recognition

Yang Liu, Jiayu Huo, Jingjing Peng, Rachel Sparks, Prokar Dasgupta, Alejandro Granados,  
Sebastien Ourselin\*

King's College London

{yang.9.liu, firstname.lastname}@kcl.ac.uk

## 1. Visualization of Different-level Features

Visual examples of different-level features are presented in Figure [SM1](#), obtained through PCA and t-SNE methods. The recorded key feature  $g$  and fused feature were used to demonstrate the effectiveness of the proposed Key-recorder in improving phase recognition performance. These findings provide strong evidence of the benefits of the key-recorder.

---

\*Corresponding author

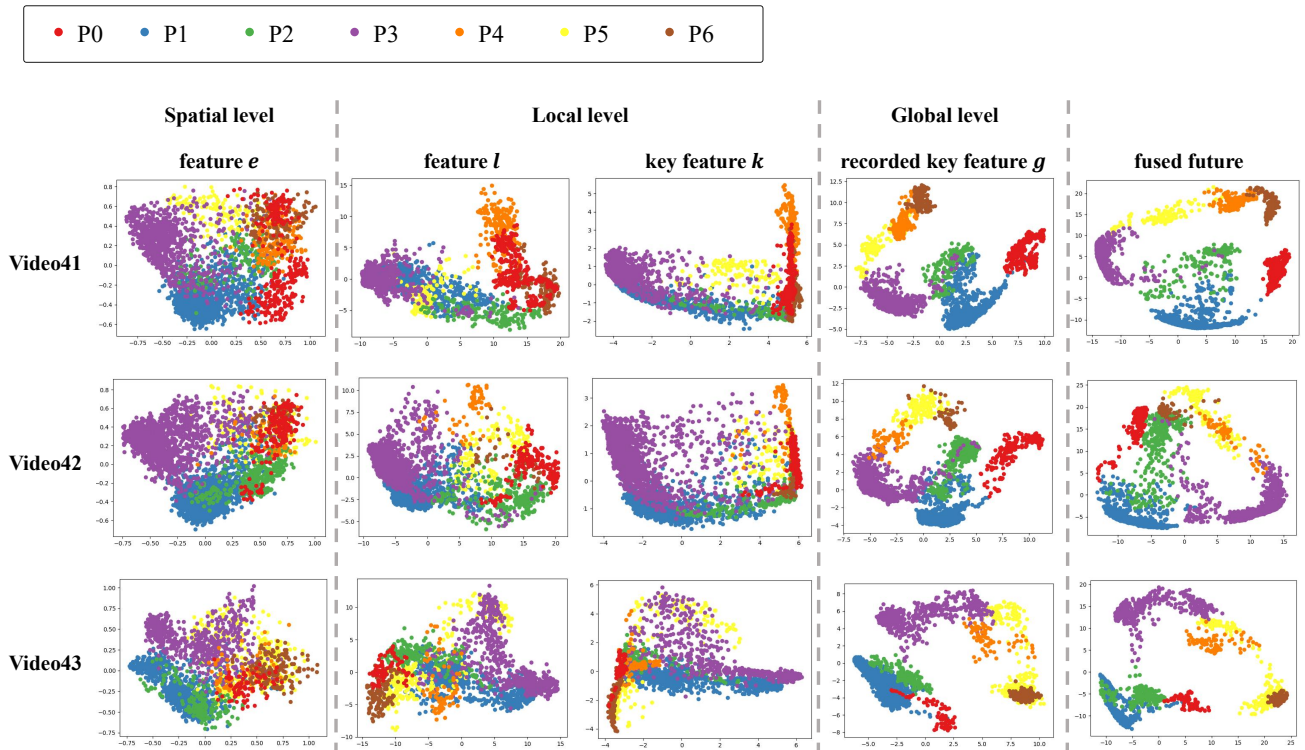

(a) Examples of visualized comparison between different-level features using PCA.

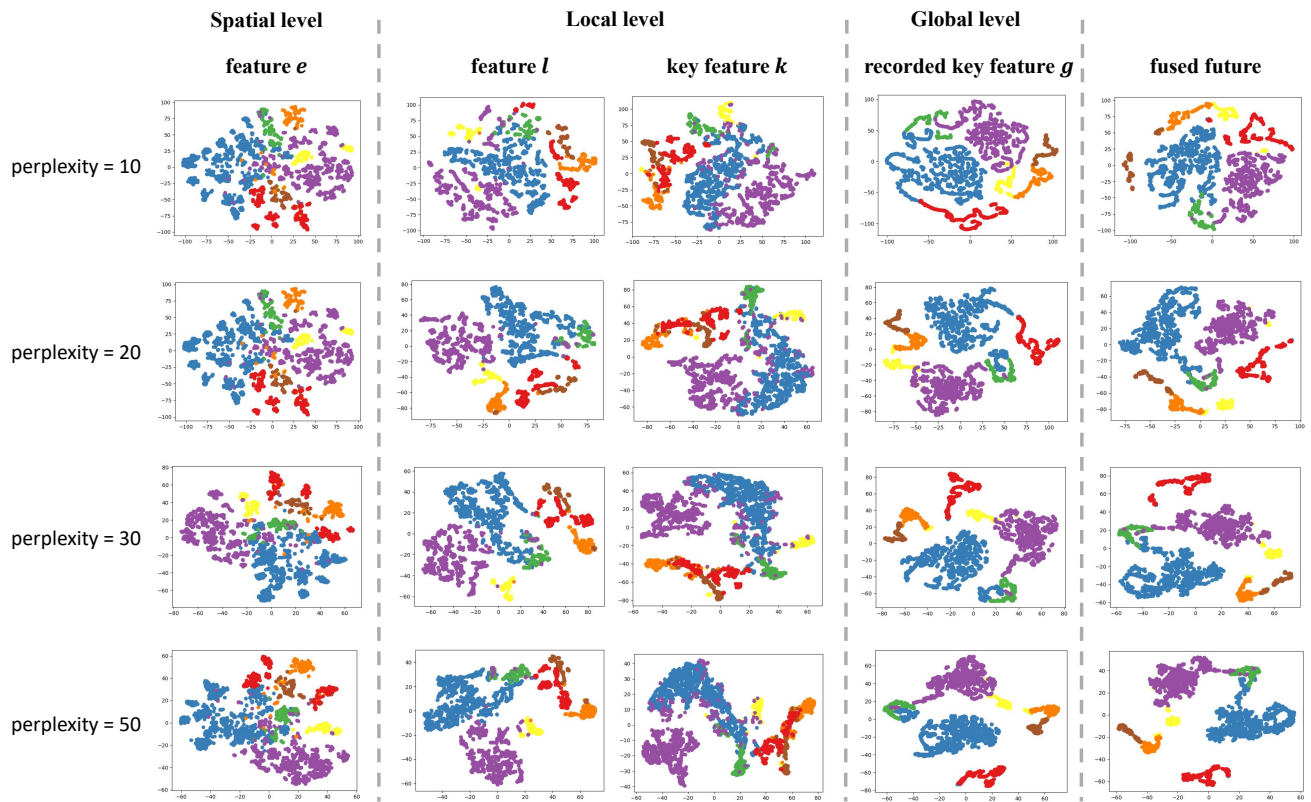

(b) Example of visualized comparison between different-level features using t-SNE with varying perplexity parameters (Video41 on test set of Cholec80).

**Figure SM1: Illustrative examples of the different-level features.** PCA and t-SNE techniques are employed to visualize various level features, such as spatial feature  $e$ , local temporal feature  $l$ , local key feature  $k$ , global recorded key feature  $g$ , and fused feature, using video examples from the Cholec80 test dataset. The phase labels are indicated by different colors, while different points correspond to distinct frame features of the video.
